# Supplementary figures and images for: Cooperative aggregation of gold nanoparticles on phospholipid vesicles is electrostatically driven
Source: Royal Society of Chemistry journal article supplement (doi:10.1039/d4cp02060j), 2024-01-01

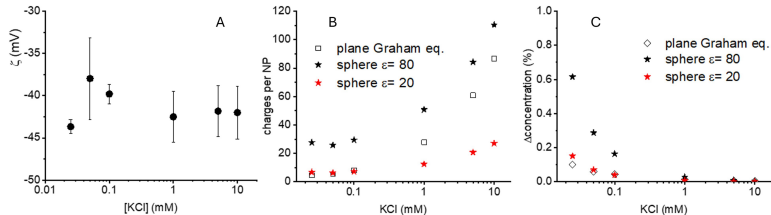

Supplement: d4cp02060j2.pdf [file d4cp02060j2.pdf]

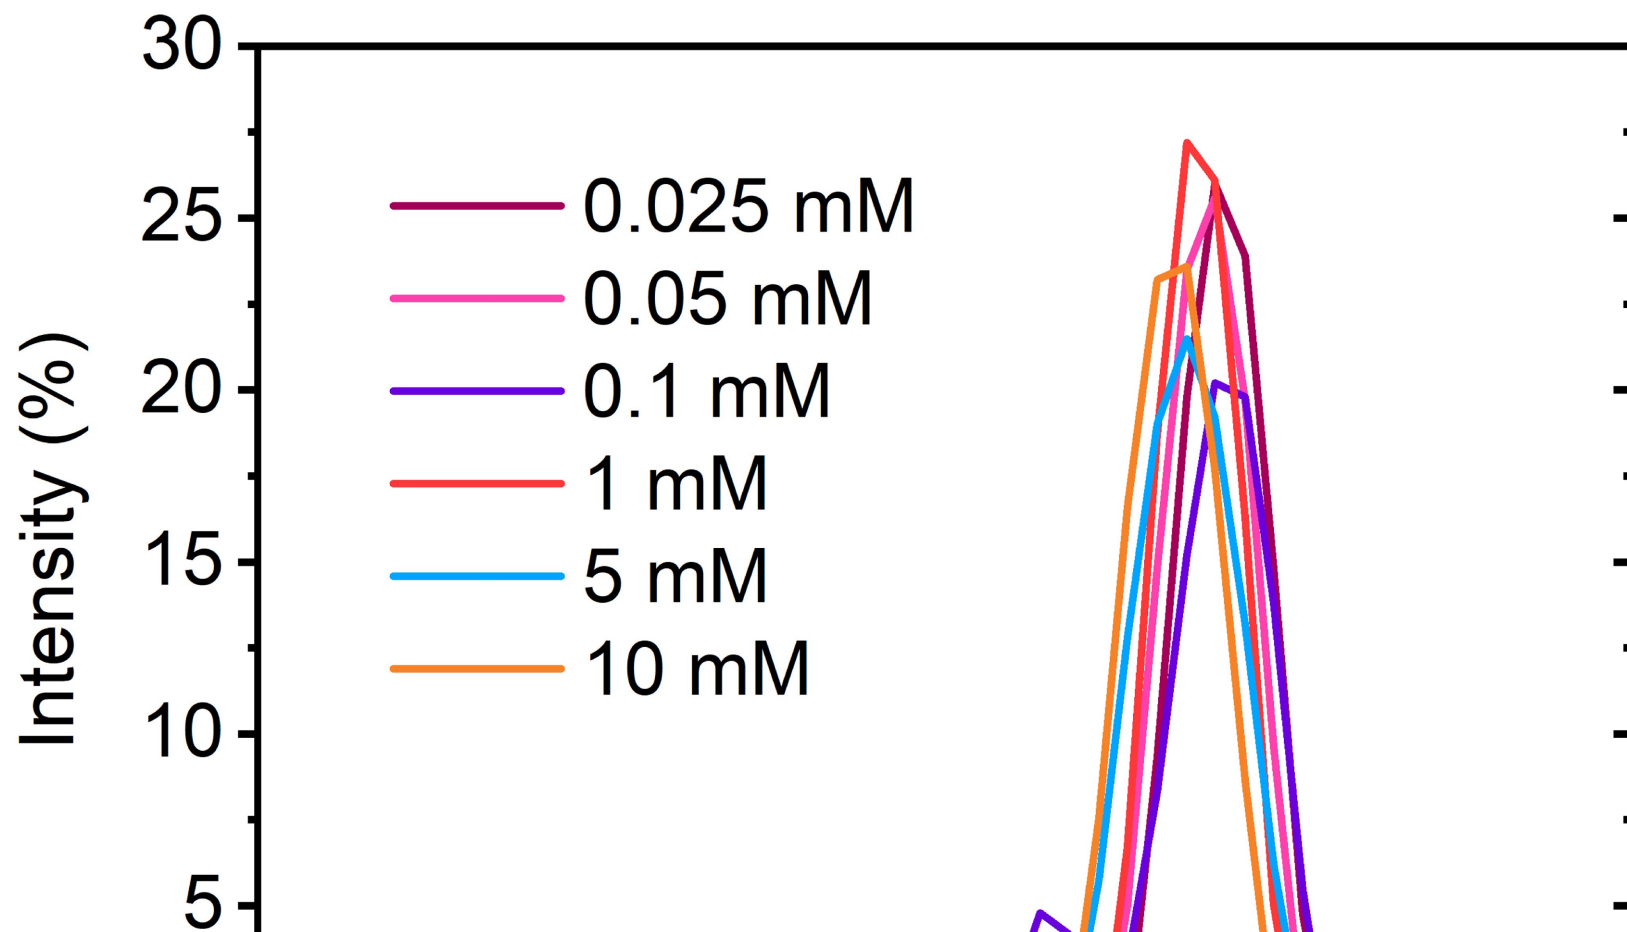

Supplement: d4cp02060j3.pdf [file d4cp02060j3.pdf]
